# Supplementary material for: Liprotides kill cancer cells by disrupting the plasma membrane
Source: PubMed Central journal article supplement (PMC5680231; doi:10.1038/s41598-017-15003-6), 2017-11-09
Supplement: 41598_2017_15003_MOESM8_ESM.pdf [file 41598_2017_15003_MOESM8_ESM.pdf]

# Liprotides kill cancer cells by disrupting the plasma membrane

Henriette S. Frislev, Theresa Louise Boye, Jesper Nylandsted and Daniel Otzen

## Supplementary Figures and Videos

**a**

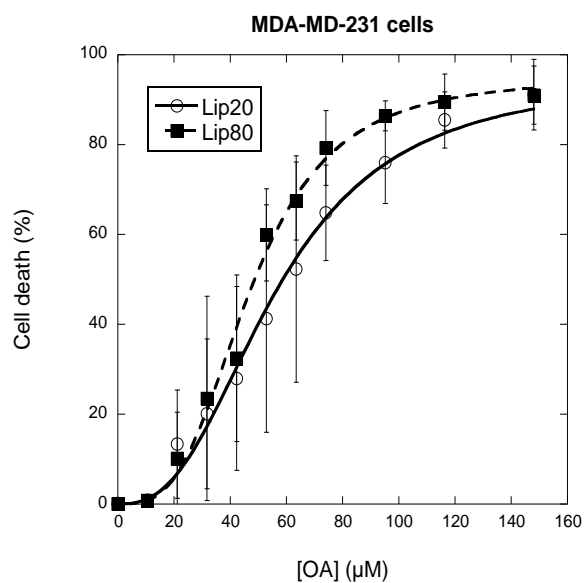

|           | Lip20          | Lip80          |
|-----------|----------------|----------------|
| $CD_0$    | $0 \pm 3.4$    | $0 \pm 3.3$    |
| $LD_{50}$ | $47.1 \pm 1.1$ | $56.4 \pm 1.4$ |
| k         | $3.2 \pm 0.2$  | $2.6 \pm 0.2$  |
| Chisq     | 90.3           | 87.6           |
| $R^2$     | 0.9932         | 0.9921         |

**b**

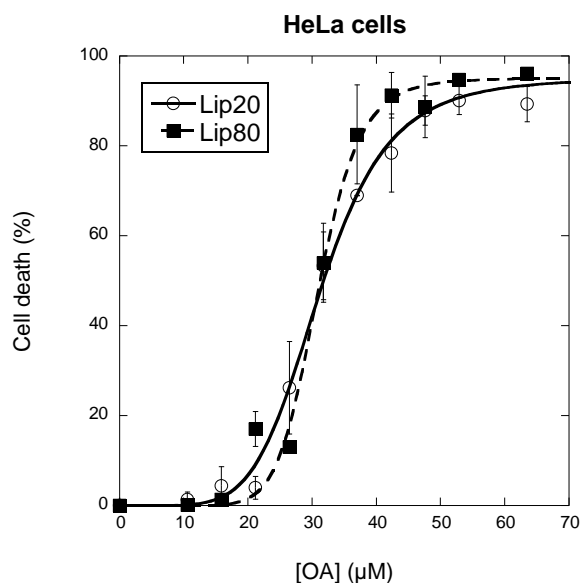

|           | Lip20          | Lip80          |
|-----------|----------------|----------------|
| $CD_0$    | $0 \pm 2.8$    | $0 \pm 5.4$    |
| $LD_{50}$ | $31.2 \pm 0.4$ | $30.9 \pm$     |
| k         | $-5.7 \pm 0.4$ | $-9.5 \pm 1.5$ |
| Chisq     | 71.45          | 263.5          |
| $R^2$     | 0.9979         | 0.9935         |

Figure S1: Percentage dead cells plotted versus OA concentration. (a) MDA-MD-231 cells treated with lip20 and lip80. (b) HeLa cells treated with lip20 and lip80. A sigmoidal curve (Eq. 1) was fitted to data for lip20 and lip80 with fitted parameters indicated below the figures.

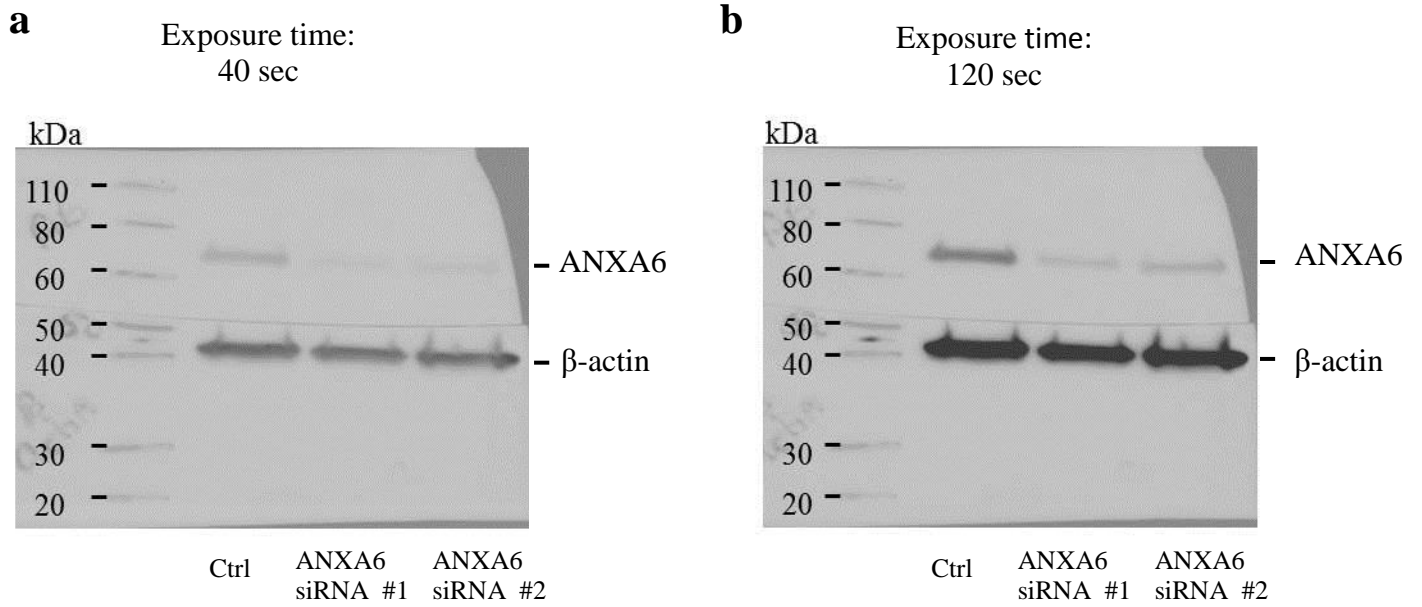

Figure S2: Immunoblot of ANXA6 protein levels from control and siRNA depleted cells.  $\beta$ -actin was used as control for equal loading. (a) Immunoblot achieved by exposure time of 40 sec. (b) Immunoblot achieved by exposure time of 120 sec.

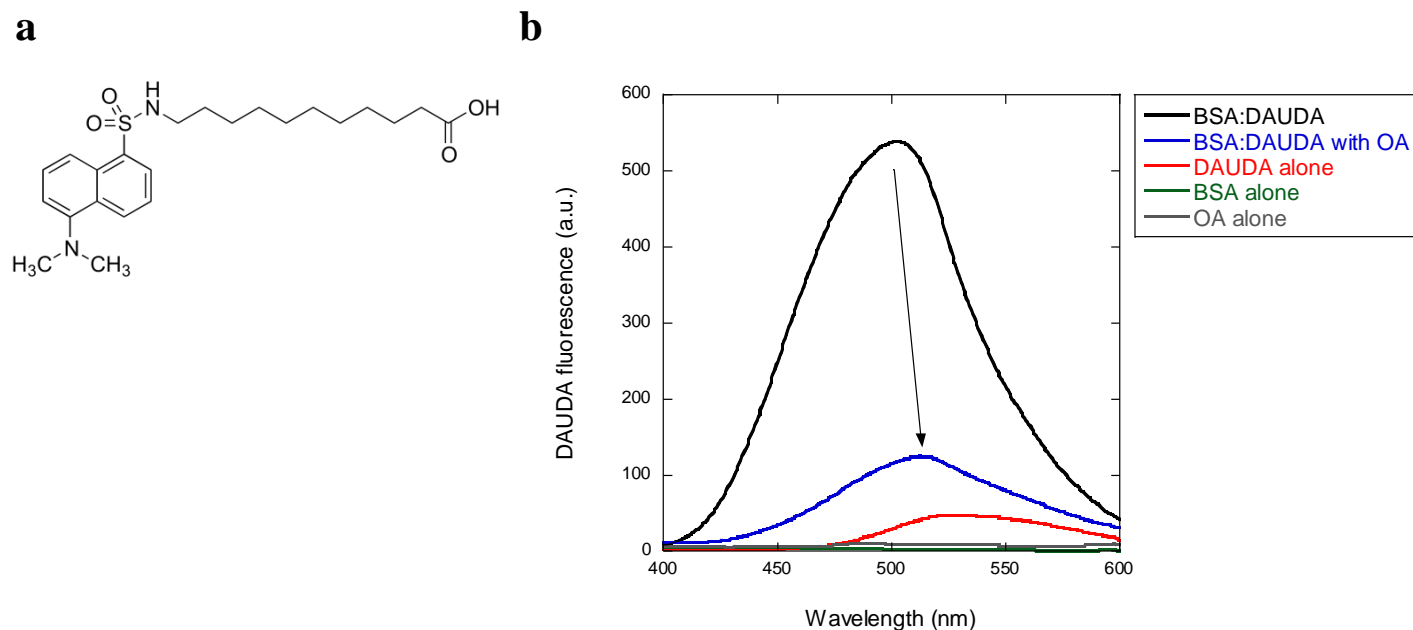

Figure S3: Change in DAUDA fluorescence cause by OA. (a) Structure of DAUDA. (b) DAUDA fluorescence measured for DAUDA in complex with BSA (BSA:DAUDA) and mixed with OA and control measurements with DAUDA alone, BSA alone and OA alone. Adding OA to a sample with BSA:DAUDA decreases and red-shifts the fluorescence of DAUDA.

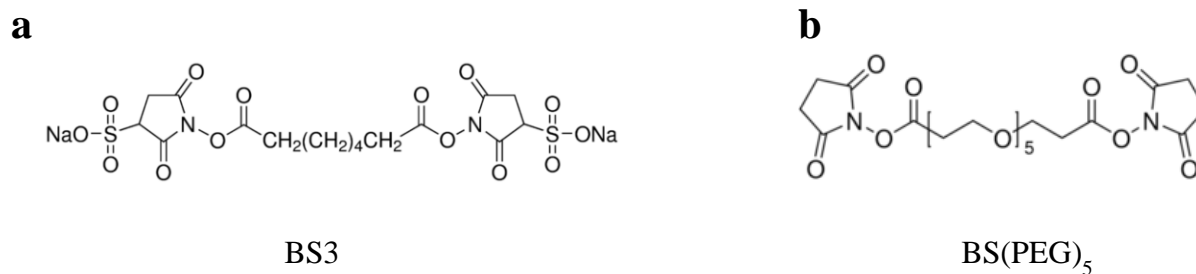

Figure S4: Structure of crosslinkers. (a) BS3. (b) BS(PEG)<sub>5</sub>.

**a**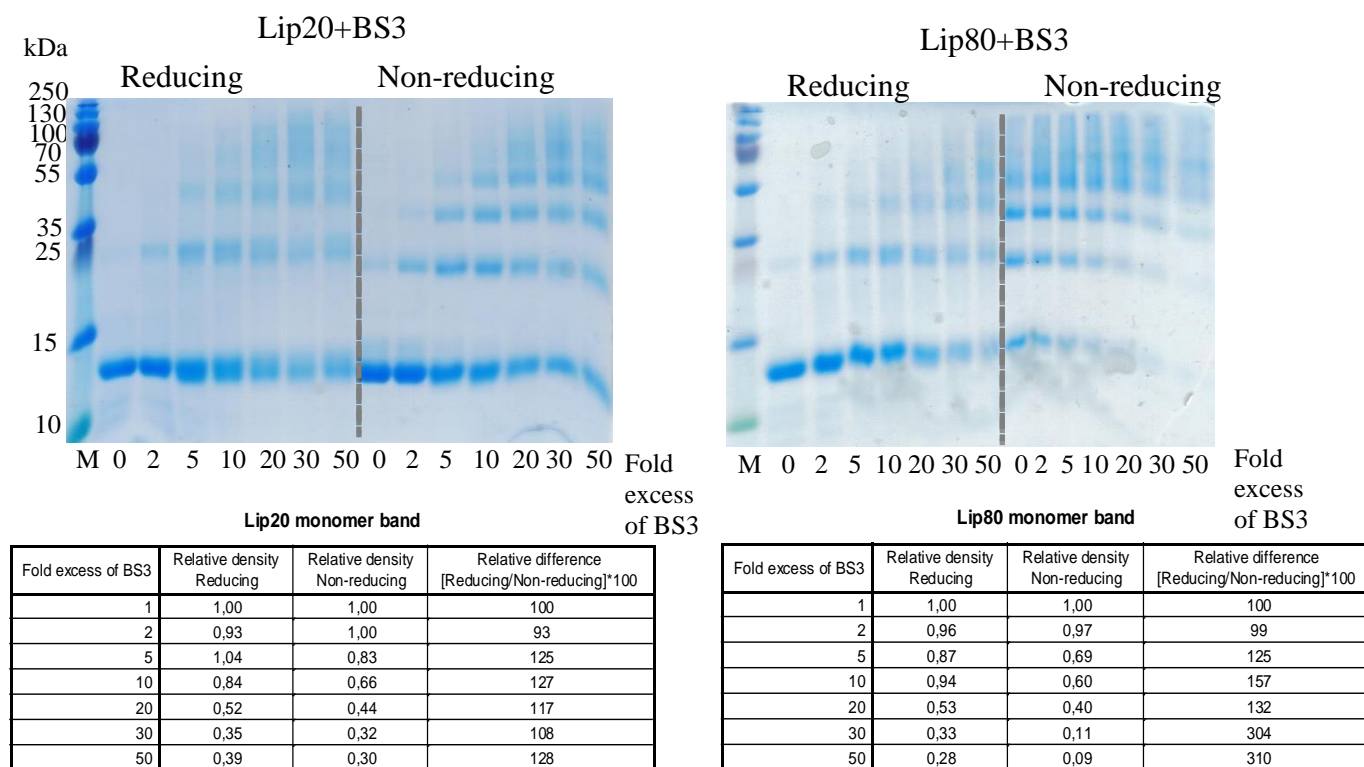**b**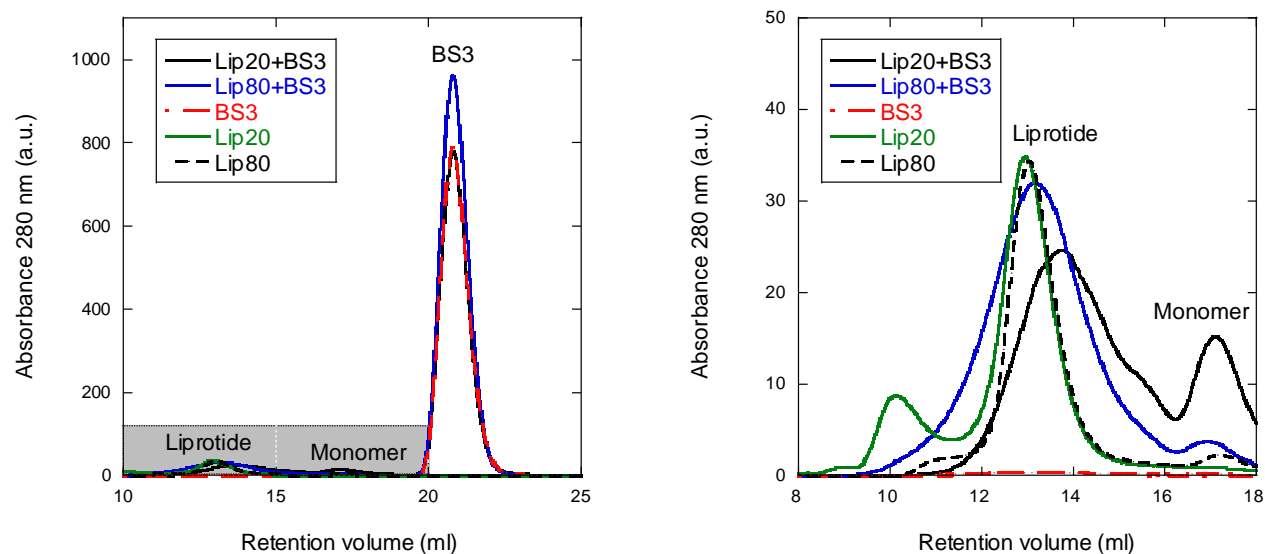

Figure S5: Lip20 and lip80 crosslinked with BS3. (a) SDS-PAGE of lip20 and lip80 crosslinked with BS3 in non-reducing and reducing conditions. The relative monomer band density is shown in the table below the figure. (b) SEC chromatogram of lip20 and lip80 crosslinked with BS3 (left) and a close up of the gray box (right).

## LEGENDS FOR SUPPLEMENTARY VIDEOS

Video S1 (file name S1.lip20): MCF7 cells treated with 52  $\mu$ M lip20 at time 0 min and induced cell death followed by FM1-43 shown in green and impermeable Hoechst in red.

Video S2 (file name S2.lip80): MCF7 cells treated with 52  $\mu$ M lip80 at time 0 min and induced cell death followed by FM1-43 shown in green and impermeable Hoechst in red.

Video S3 (file name S3.lip80GFP): MCF7 cells expressing GFP treated with 212  $\mu$ M lip80 at time 0 min. GFP is shown in green and impermeable Hoechst in red.

Video S4 (file name S4.lip80-ca): MCF7 cells in media without  $\text{Ca}^{2+}$  treated with 52  $\mu$ M lip80 at time 0 min and induced cell death followed by FM1-43 shown in green and impermeable Hoechst in red.

Video S5 (file name S5.lip80+ca): MCF7 cells in media with  $\text{Ca}^{2+}$  treated with 52  $\mu$ M lip80 at time 0 min and induced cell death followed by FM1-43 shown in green and impermeable Hoechst in red.

Video S6 (file name S6.lip80+ca): MCF7 cells expressing ANXA6-GFP in media with  $\text{Ca}^{2+}$  treated with 212  $\mu$ M lip80 at time 0 min. Green is ANXA6-GFP and blue is impermeable Hoechst.

Video S7 (file name S7.lip80-ca): MCF7 cells expressing ANXA6-GFP in media without  $\text{Ca}^{2+}$  treated with 212  $\mu$ M lip80 at time 0 min. Green is ANXA6-GFP and blue is impermeable Hoechst.
